# Supplementary material for: Quality Indicators in Pediatric Palliative Care: Considerations for Latin America
Source: MDPI journal article supplement (doi:10.3390/children8030250), 2021-03-23
Supplement: s1 [file s1]

## Supplementary Materials

**Table S1.** Selected list of standards of care in pediatric palliative care.

| <b>Together for Short Lives</b>                         | <b>National Institute for Health and Care Excellence</b>                            | <b>Partners for Children Program</b>                        | <b>Paediatric End-of-Life Care Needs (PELICAN) study</b>                    | <b>National Consensus Project for Quality Palliative Care</b> | <b>National Hospice and Palliative Care Organization</b>                                          | <b>European association of palliative care</b>                |
|---------------------------------------------------------|-------------------------------------------------------------------------------------|-------------------------------------------------------------|-----------------------------------------------------------------------------|---------------------------------------------------------------|---------------------------------------------------------------------------------------------------|---------------------------------------------------------------|
| Sharing prognosis and significant news                  | Involve patients and families in developing an advanced care plan                   | Care coordination across settings                           | Support for the family unit                                                 | Structure and processes of care                               | Clinical excellence and safety: pursue comfort and minimize total pain and suffering              | Provision of care across settings during all disease stages   |
| Seamless transition between hospital and community care | Have a medical specialist who leads and coordinates their care                      | Expressive therapies including art, music, play and massage | Communication with the child and the family about treatment goals and plans | Physical aspects of care                                      | Compliance with laws and regulation                                                               | Child and family as the unit of care                          |
| Multi-disciplinary assessment of needs                  | Receive information about emotional and psychosocial support and how to access it   | Family education                                            | Ethics and shared decision-making                                           | Psychological and psychiatric aspects of care                 | Ethical behavior and consumer rights: clinical decisions guided by the best interest of the child | Care team with a holistic approach                            |
| A child and family care plan                            | Receive care by a multidisciplinary team that includes specialized PPC <sup>1</sup> | Respite                                                     | Symptom management                                                          | Social aspects of care                                        | Inclusion and access: equitable access to care                                                    | Care coordinator / keyworker designated to patient and family |
| End of life plan                                        | Receive support for grief and loss before and after death                           | Family and bereavement counseling                           | Continuity of care                                                          | Spiritual, religious, and existential                         | Organizational excellence: flexible delivery of                                                   | Symptom management available 24/7                             |

|                                |                            |                                            |                               |                                      |                                                                   |                                                        |
|--------------------------------|----------------------------|--------------------------------------------|-------------------------------|--------------------------------------|-------------------------------------------------------------------|--------------------------------------------------------|
|                                |                            |                                            |                               | aspects of care                      | care across settings                                              |                                                        |
| Continuing bereavement support | Have 24-hour access to PPC | Pain and symptom management available 24/7 | Grief and bereavement support | Cultural aspects of care             | Patient and family-centered care                                  | Respite care                                           |
|                                |                            |                                            |                               | Care of the imminently dying patient | Performance measurement: continuous quality assessment of care    | Bereavement support before and after death             |
|                                |                            |                                            |                               | Ethical and legal aspects of care    | Stewardship and accountability: development of policies           | Age-appropriate care                                   |
|                                |                            |                                            |                               |                                      | Workforce excellence: training and self-care for all team members | Education and training for professional and volunteers |
|                                |                            |                                            |                               |                                      |                                                                   | Funding for palliative care services                   |

<sup>1</sup> PPC: pediatric palliative care.

**Table S2.** Selected list of quality indicator's themes in pediatric palliative care.

| <b>Mitchell et al., 2017</b> | <b>Marcus et al., 2020</b>           | <b>Zuniga-Villanueva et al., 2020</b>        | <b>Widger et al., 2004</b>              | <b>Widger et al., 2019</b> |
|------------------------------|--------------------------------------|----------------------------------------------|-----------------------------------------|----------------------------|
| Quality of Life              | Patient symptoms and quality of life | Intensity of treatment                       | Information transmission                | Health care utilization    |
| Symptom control              | Caregiver outcomes                   | Psychological, social, and spiritual support | Preparation for death and care at death | Location of death          |
| Place of care                | End-of-life discussions              | Communication                                | Bereavement care                        | Cost                       |

|                |                                    |                                          |                                                              |                                           |
|----------------|------------------------------------|------------------------------------------|--------------------------------------------------------------|-------------------------------------------|
| Family support | Patterns of end-of-life care       | Location of Care                         | Interpersonal aspects and competence of health professionals | Child's quality of life                   |
|                | Health care utilization            | Symptom management                       | Clarity and honesty of communication                         | Child's symptom assessment and management |
|                | Utilization of supportive services | Bereavement care                         | Parent Role                                                  | Procedures                                |
|                |                                    | Predicted versus real neonatal outcomes  | Support for the family                                       | Family health                             |
|                |                                    | Parental coping, stress and satisfaction | Pain and symptom management                                  | Family support                            |
|                |                                    |                                          | Decision making                                              | Communication with healthcare providers   |
|                |                                    |                                          | Psychosocial and spiritual needs of child                    | End-of-life care discussions and planning |
|                |                                    |                                          | Availability and accessibility                               | Quality of care provision                 |
|                |                                    |                                          | Coordination and integration                                 | Bereavement follow up                     |
|                |                                    |                                          | Respite care                                                 | Effect on health care providers           |
|                |                                    |                                          | Financial arrangements                                       | Others                                    |
